# Supplementary figures and images for: A mid-infrared high-performance spectropolarimetry filter based on dual-mode independent modulation
Source: Royal Society of Chemistry journal article supplement (doi:10.1039/d3nr01331f), 2023-01-01

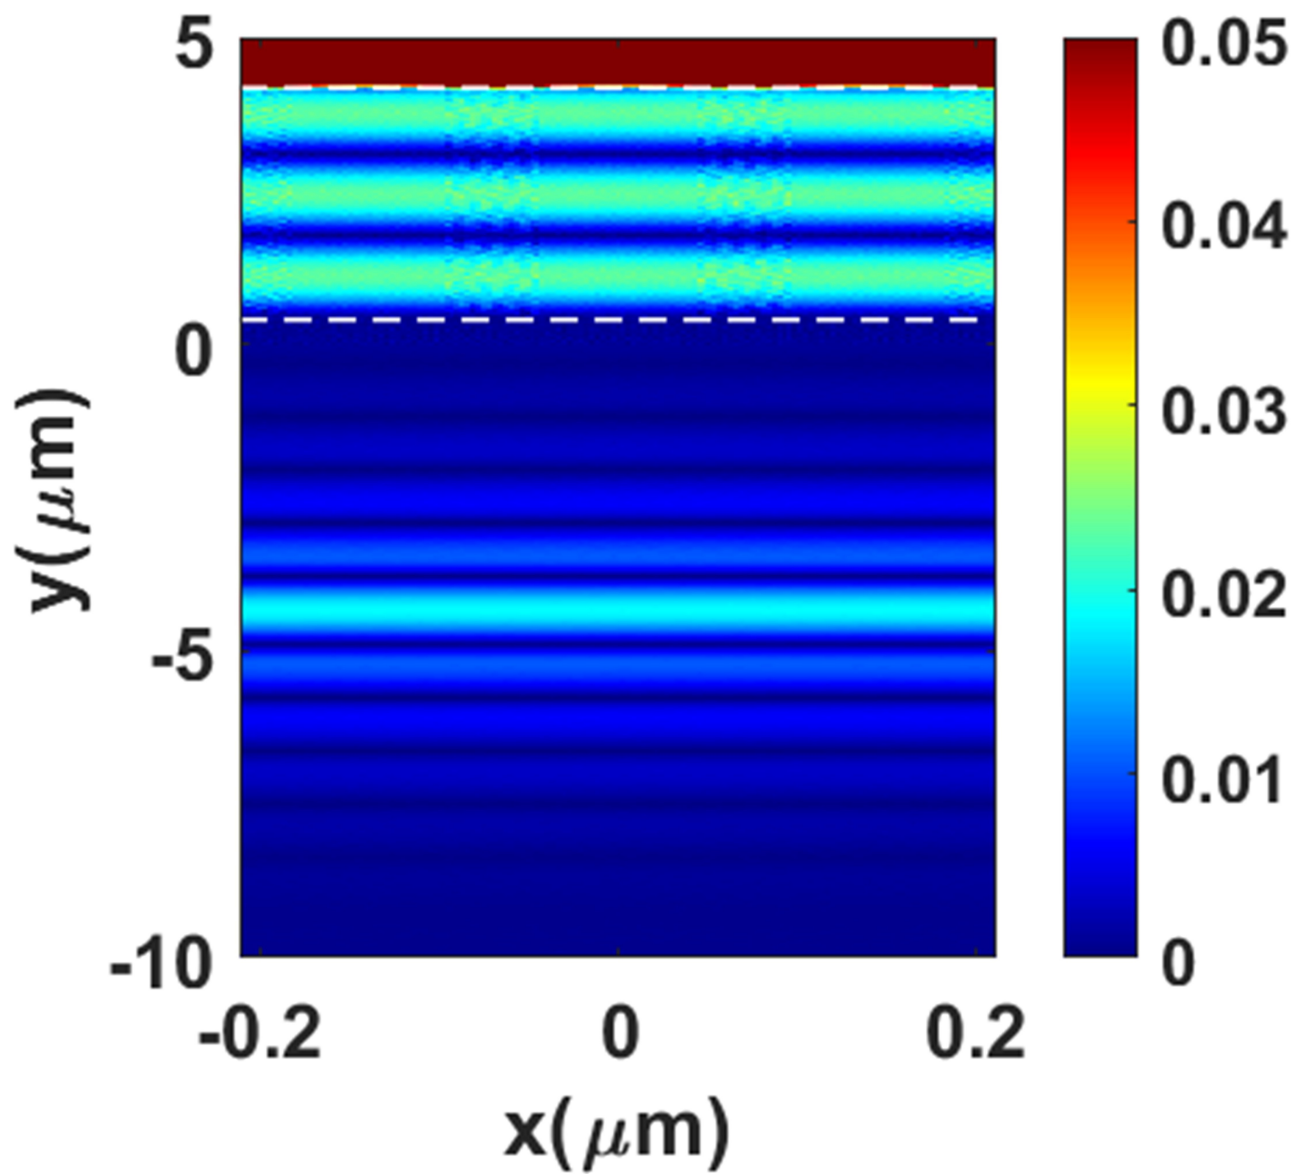

Supplement: d3nr01331f5.pdf [file d3nr01331f5.pdf]

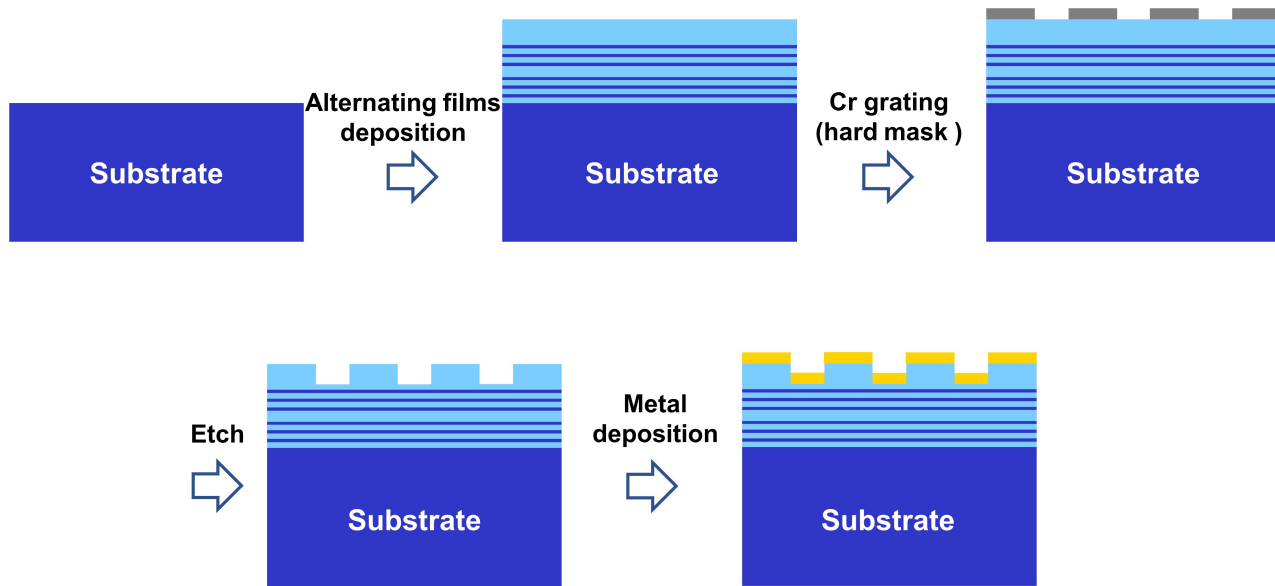

Supplement: d3nr01331f7.pdf [file d3nr01331f7.pdf]

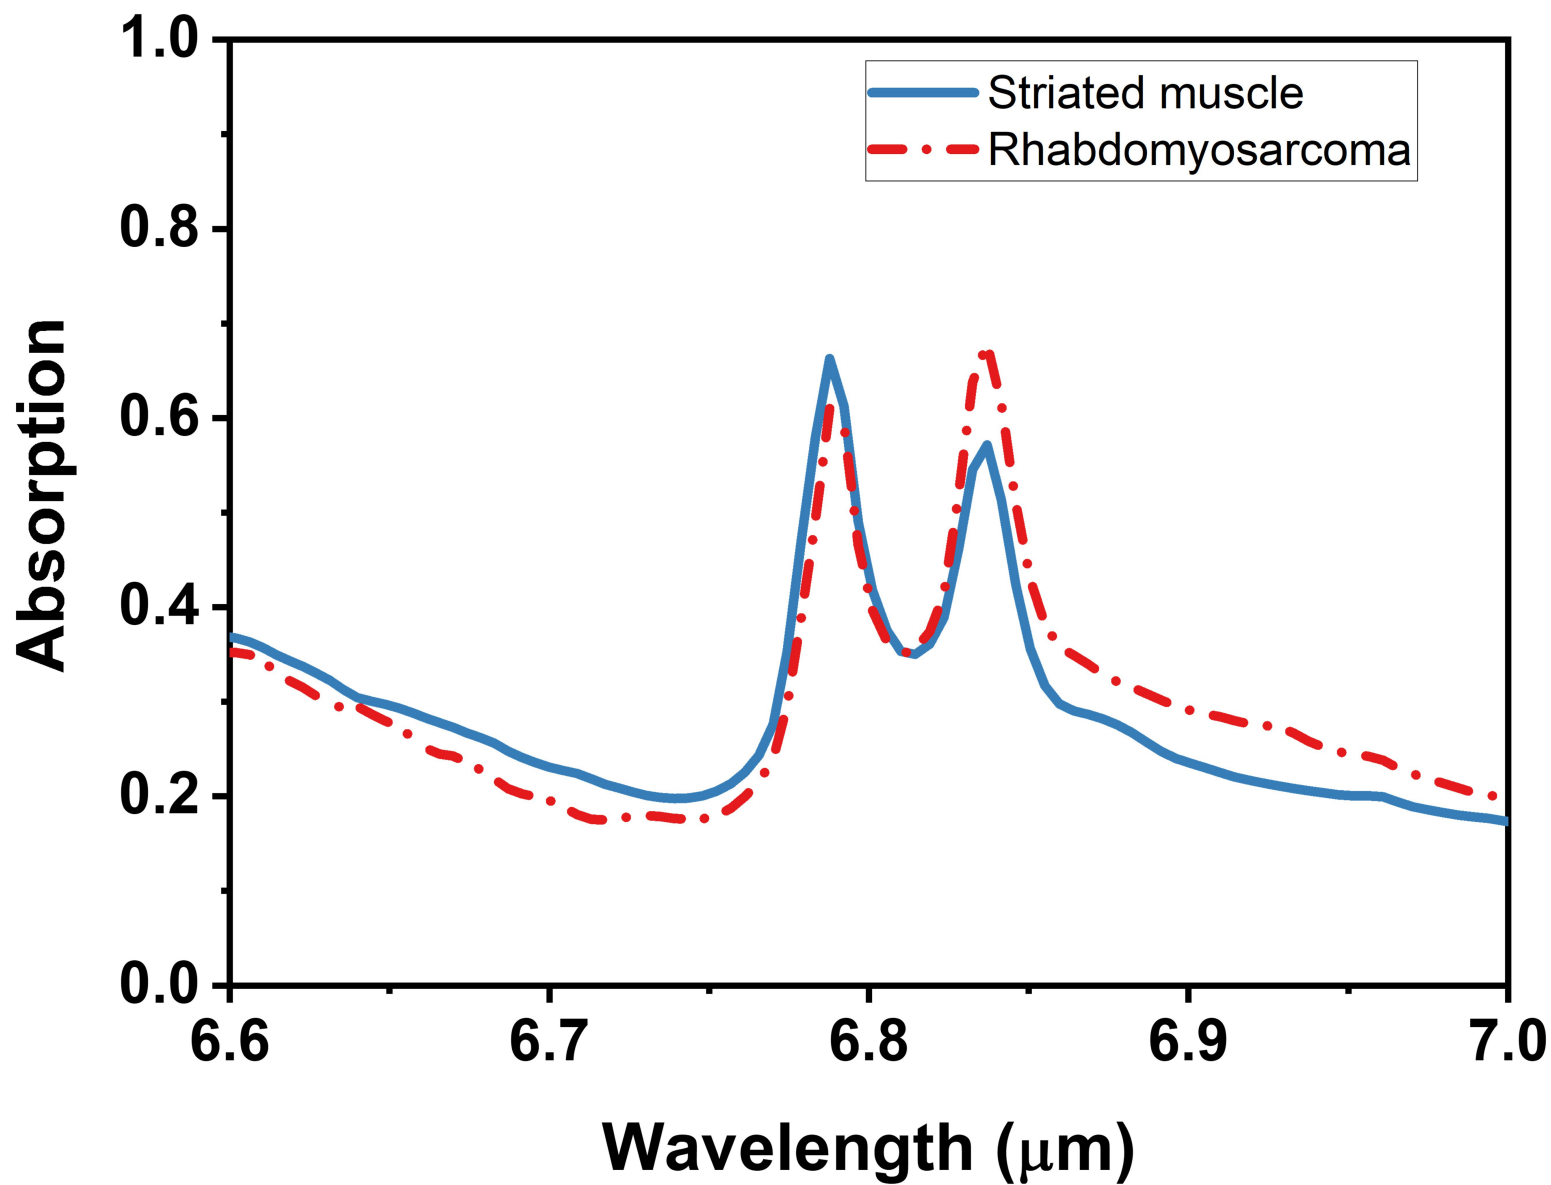

Supplement: d3nr01331f8.pdf [file d3nr01331f8.pdf]
